# Supplementary material for: Effects of lacosamide and carbamazepine on lipids in a randomized trial
Source: PubMed Central journal article supplement — Epilepsia. 2020 Nov 17;61(12):2696–704. doi: 10.1111/epi.16745 (PMC7756649; doi:10.1111/epi.16745), 2020-11-17
Supplement: EPI-61-2696-s002.pdf [file EPI-61-2696-s002.pdf]

## SUPPORTING INFORMATION

**TABLE S1**

Baseline patient demographics and characteristics (3-month population)

|                                                                                                                                                           | <b>Lacosamide<br/>(n = 210)</b> | <b>Carbamazepine<br/>(n = 221)</b> | <b>Total<br/>(n = 431)</b> |
|-----------------------------------------------------------------------------------------------------------------------------------------------------------|---------------------------------|------------------------------------|----------------------------|
| Age, mean (SD), years                                                                                                                                     | 39.0 (16.4)                     | 37.8 (15.8)                        | 38.4 (16.1)                |
| <25 years, n (%)                                                                                                                                          | 52 (24.8)                       | 58 (26.2)                          | 110 (25.5)                 |
| 25 to <45 years, n (%)                                                                                                                                    | 86 (41.0)                       | 87 (39.4)                          | 173 (40.1)                 |
| 45 to <65 years, n (%)                                                                                                                                    | 52 (24.8)                       | 63 (28.5)                          | 115 (26.7)                 |
| ≥65 years, n (%)                                                                                                                                          | 20 (9.5)                        | 13 (5.9)                           | 33 (7.7)                   |
| Male, n (%)                                                                                                                                               | 118 (56.2)                      | 128 (57.9)                         | 246 (57.1)                 |
| Weight, kg, mean (SD)                                                                                                                                     | 70.8 (16.0)                     | 72.3 (15.7)                        | 71.5 (15.8)                |
| Body mass index, mean (SD), kg/m <sup>2</sup>                                                                                                             | 24.4 (4.7)                      | 24.9 (4.9)                         | 24.7 (4.8)                 |
| <25, n (%)                                                                                                                                                | 123 (58.6)                      | 124 (56.1)                         | 247 (57.3)                 |
| 25 to <30, n (%)                                                                                                                                          | 63 (30.0)                       | 73 (33.0)                          | 136 (31.6)                 |
| ≥30, n (%)                                                                                                                                                | 24 (11.4)                       | 24 (10.9)                          | 48 (11.1)                  |
| Comorbid endocrine disorders, metabolism and nutrition disorders, social circumstances, vascular disorders reported by ≥2% of total patients <sup>i</sup> |                                 |                                    |                            |
| Hypertension, n (%)                                                                                                                                       | 31 (14.8)                       | 41 (18.6)                          | 72 (16.7)                  |
| Postmenopause, n (%)                                                                                                                                      | 12 (5.7)                        | 11 (5.0)                           | 23 (5.3)                   |
| Hypercholesterolemia, n (%)                                                                                                                               | 7 (3.3)                         | 11 (5.0)                           | 18 (4.2)                   |
| Obesity, n (%)                                                                                                                                            | 3 (1.4)                         | 10 (4.5)                           | 13 (3.0)                   |
| Menopause, n (%)                                                                                                                                          | 3 (1.4)                         | 10 (4.5)                           | 13 (3.0)                   |
| Hypothyroidism, n (%)                                                                                                                                     | 3 (1.4)                         | 8 (3.6)                            | 11 (2.6)                   |

| Total cholesterol                                                                 |                         |                         |                         |
|-----------------------------------------------------------------------------------|-------------------------|-------------------------|-------------------------|
| Patients with levels below upper limit of the reference range, n (%) <sup>a</sup> | 135 (64.6) <sup>c</sup> | 149 (67.4)              | 284 (66.0) <sup>d</sup> |
| Patients with levels above upper limit of the reference range, n (%) <sup>b</sup> | 74 (35.4) <sup>c</sup>  | 72 (32.6)               | 146 (34.0) <sup>d</sup> |
| LDL-cholesterol                                                                   |                         |                         |                         |
| Patients with levels below upper limit of the reference range, n (%) <sup>e</sup> | 154 (73.7) <sup>c</sup> | 176 (81.1) <sup>g</sup> | 330 (77.5) <sup>h</sup> |
| Patients with levels above upper limit of the reference range, n (%) <sup>f</sup> | 55 (26.3) <sup>c</sup>  | 41 (18.9) <sup>g</sup>  | 96 (22.5) <sup>h</sup>  |

Abbreviations: LDL, low-density lipoprotein; SD, standard deviation.

<sup>a</sup>Total cholesterol levels  $\leq$ 200 mg/dL.

<sup>b</sup>Total cholesterol levels  $>$ 200 mg/dL.

<sup>c</sup>n = 209.

<sup>d</sup>n = 430.

<sup>e</sup>LDL-cholesterol levels  $\leq$ 130 mg/dL.

<sup>f</sup>LDL-cholesterol levels  $>$ 130 mg/dL.

<sup>g</sup>n = 217.

<sup>h</sup>n = 426.

<sup>i</sup>Hepatobiliary disorders were also evaluated; however, no preferred term was reported by  $\geq$ 2% Total patients.

**TABLE S2**

Percentage of patients on each dose level at 12 months and 3 months

| Patients (%) | 12-month population |                  |                    | 3-month population |                  |                    |
|--------------|---------------------|------------------|--------------------|--------------------|------------------|--------------------|
|              | LCM<br>(n = 138)    | CBZ<br>(n = 133) | Total<br>(n = 271) | LCM<br>(n = 210)   | CBZ<br>(n = 221) | Total<br>(n = 431) |
| Dose level 1 | 93.5                | 91.7             | 92.6               | 72.9               | 73.8             | 73.3               |
| Dose level 2 | 3.6                 | 6.0              | 4.8                | 17.6               | 19.0             | 18.3               |
| Dose level 3 | 2.9                 | 2.3              | 2.6                | 9.5                | 7.2              | 8.4                |

Abbreviations: CBZ, carbamazepine; LCM, lacosamide.

Lacosamide: dose level 1: 200 mg/d; dose level 2: 400 mg/d; dose level 3: 600 mg/d;  
 carbamazepine: dose level 1: 400 mg/d; dose level 2: 800 mg/d; dose level 3: 1200 mg/d.

**TABLE S3**

Total cholesterol and LDL cholesterol at Baseline and 3 months and change from Baseline to 3 months (3-month population) in patients with baseline levels below or above the upper limit of the reference range

| Treatment                                                                           | n   | Baseline,<br>mean (SD) | 3-month<br>treatment <sup>a</sup> ,<br>mean (SD) | Analysis of covariance model <sup>b</sup><br>Change in lipid levels from<br>Baseline at 3 months |              |                        |
|-------------------------------------------------------------------------------------|-----|------------------------|--------------------------------------------------|--------------------------------------------------------------------------------------------------|--------------|------------------------|
|                                                                                     |     |                        |                                                  | n                                                                                                | LS mean (SE) | P-value<br>(treatment) |
| Total cholesterol below upper limit of the reference range at Baseline <sup>c</sup> |     |                        |                                                  |                                                                                                  |              |                        |
| LCM, mg/dL                                                                          | 135 | 168.1 (24.4)           | 169.3 (28.2)                                     | 135                                                                                              | 1.8 (1.9)    | < .001                 |
| CBZ, mg/dL                                                                          | 149 | 161.0 (26.3)           | 179.4 (31.4) <sup>****</sup>                     | 149                                                                                              | 18.4 (1.8)   |                        |
| Total cholesterol above upper limit of the reference range at Baseline <sup>d</sup> |     |                        |                                                  |                                                                                                  |              |                        |
| LCM, mg/dL                                                                          | 74  | 227.1 (21.7)           | 214.6 (30.2) <sup>****</sup>                     | 74                                                                                               | -11.3 (4.0)  | < .001                 |
| CBZ, mg/dL                                                                          | 72  | 227.3 (20.3)           | 248.1 (48.8) <sup>****</sup>                     | 72                                                                                               | 20.2 (4.0)   |                        |
| LDL cholesterol below upper limit of the reference range at Baseline <sup>e</sup>   |     |                        |                                                  |                                                                                                  |              |                        |
| LCM, mg/dL                                                                          | 154 | 96.1 (21.5)            | 96.8 (25.6)                                      | 154                                                                                              | 1.1 (1.6)    | < .001                 |
| CBZ, mg/dL                                                                          | 176 | 89.7 (23.9)            | 101.1 (30.2) <sup>****</sup>                     | 176                                                                                              | 11.2 (1.5)   |                        |
| LDL cholesterol above upper limit of the reference range at Baseline <sup>f</sup>   |     |                        |                                                  |                                                                                                  |              |                        |
| LCM, mg/dL                                                                          | 55  | 147.7 (14.9)           | 135.7 (21.8) <sup>****</sup>                     | 55                                                                                               | -11.0 (3.1)  | < .001                 |
| CBZ, mg/dL                                                                          | 41  | 151.5 (14.0)           | 168.2 (30.5) <sup>***</sup>                      | 41                                                                                               | 16.1 (3.7)   |                        |

Abbreviations: ANCOVA, analysis of covariance; CBZ, carbamazepine; LCM, lacosamide; LDL, low-density lipoprotein; LS, least squares; SD, standard deviation; SE, standard error.

<sup>a</sup>The 3-month lipid levels included lipid values collected at 90 days (plus a 30-day window) of treatment during the Treatment period.

<sup>b</sup>The ANCOVA model included treatment as a main effect and age, sex, body mass index, and Baseline lipid level as covariates.

<sup>c</sup>Total cholesterol levels  $\leq 200$  mg/dL.

<sup>d</sup>Total cholesterol levels  $> 200$  mg/dL.

<sup>e</sup>LDL-cholesterol levels  $\leq 130$  mg/dL.

<sup>f</sup>LDL-cholesterol levels  $> 130$  mg/dL.

Within-treatment group comparison 3 months vs Baseline; paired *t* test

\*\*\**P* < .001.

\*\*\*\**P* < .0001.

**FIGURE S1**

Patients included in the 12-month lipid analysis (Safety Set)

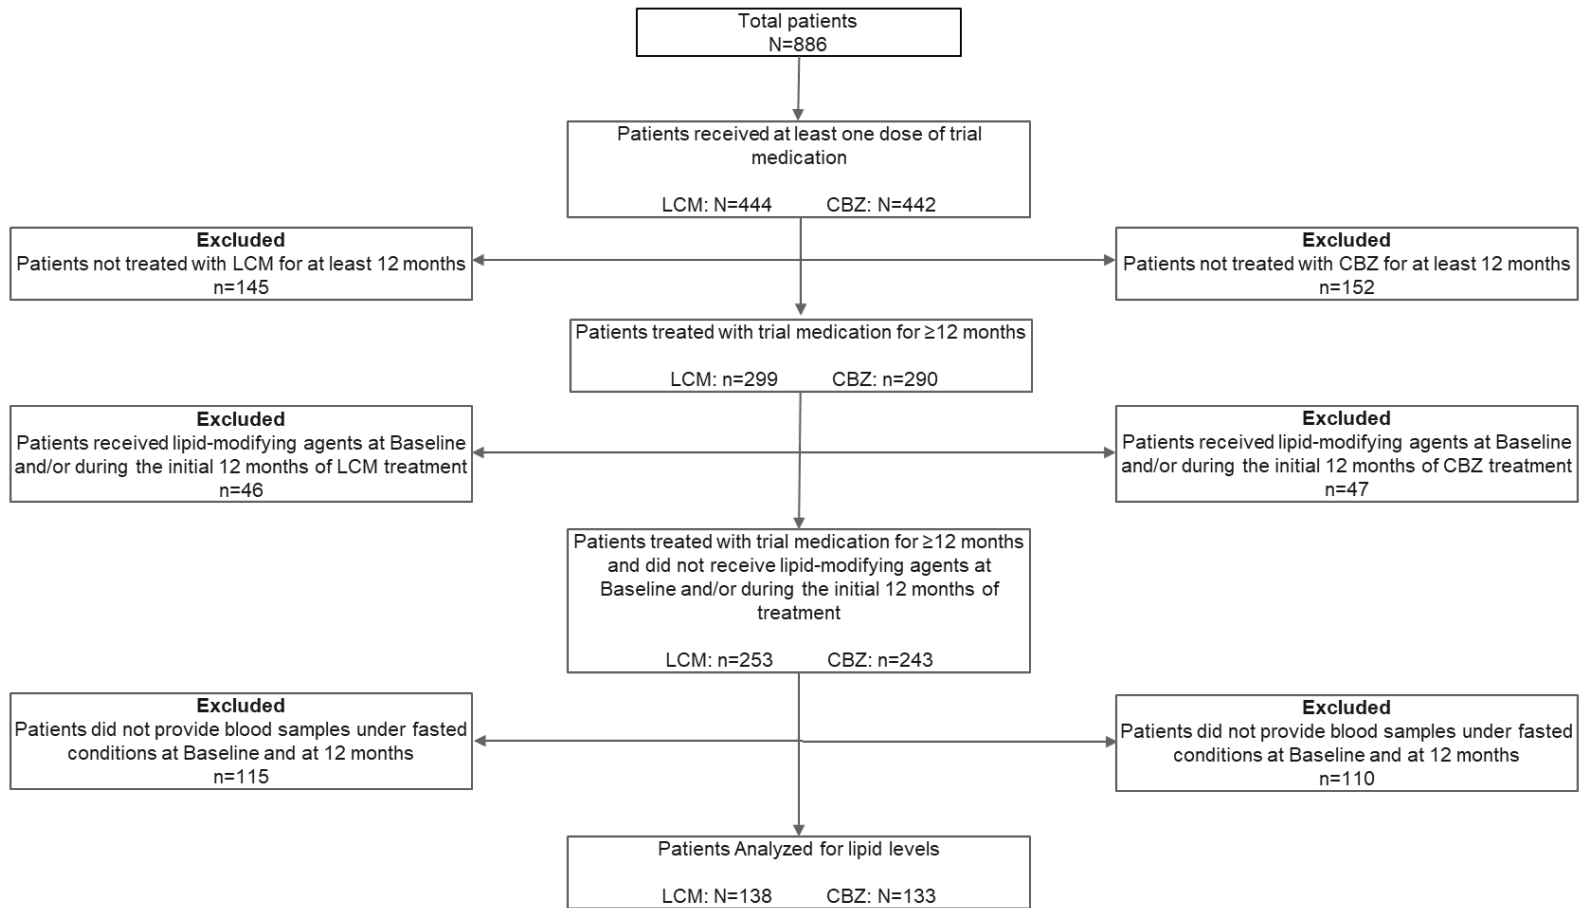

CBZ, carbamazepine; LCM, lacosamide.

**FIGURE S2**

**Patients included in the 3-month lipid analysis (Safety Set)**

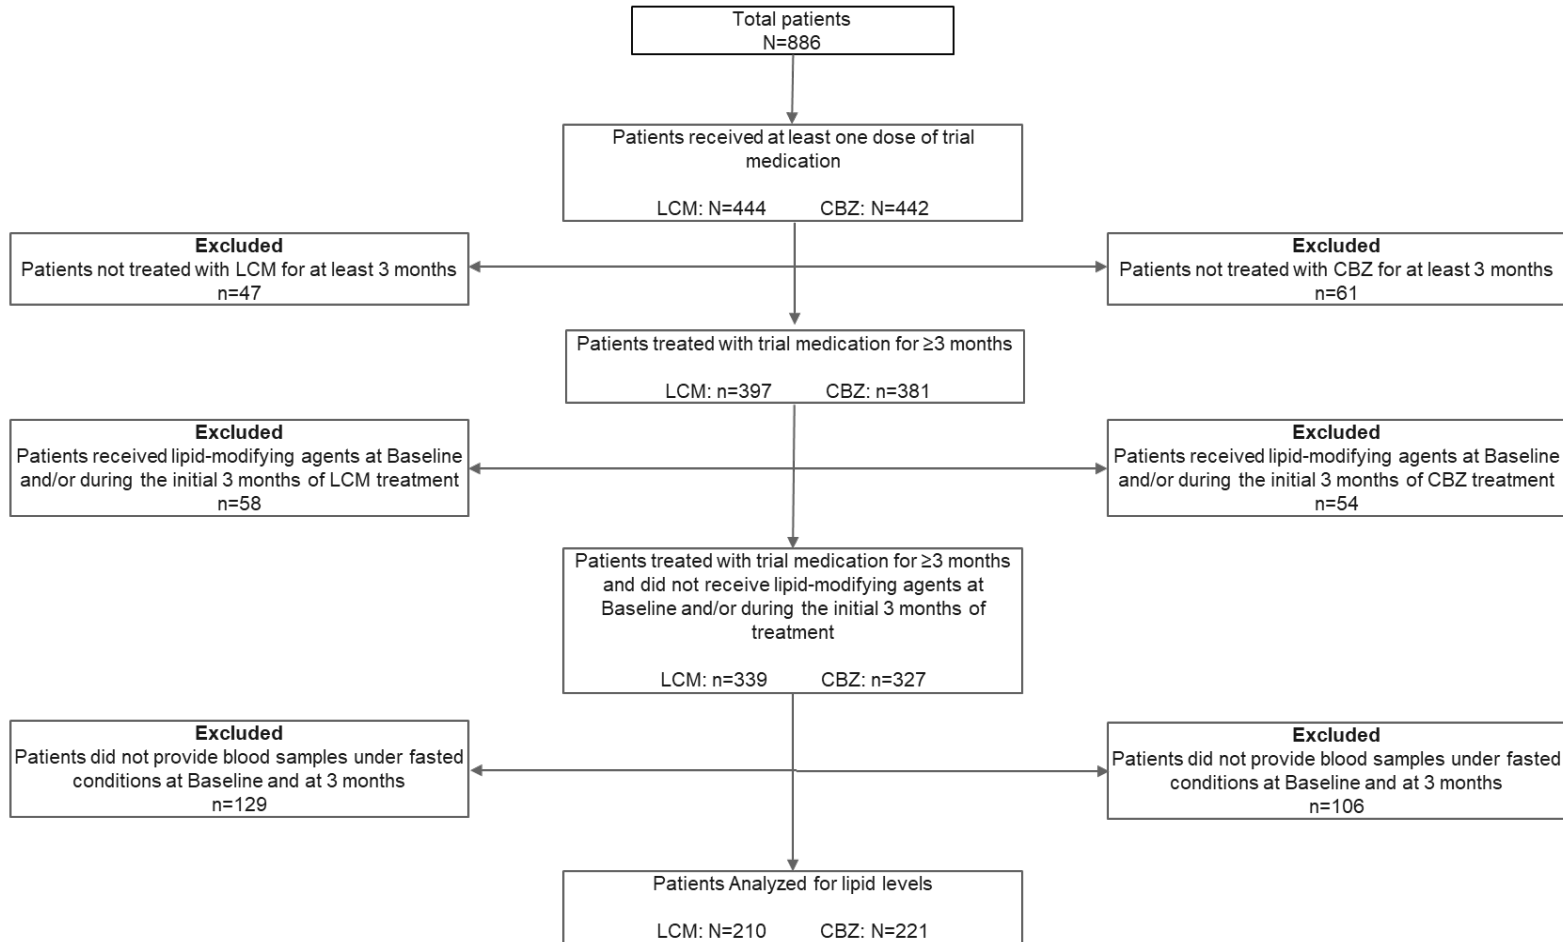

CBZ, carbamazepine; LCM, lacosamide.

### Supporting information: changes in lipids levels at 3 months

At 3 months, mean lipid levels at Baseline were generally similar between patients randomized to LCM and CBZ (Figure S1). Three-month LCM monotherapy did not increase the mean levels of TC, LDL-C, non-HDL-C, HDL-C, and TGs. Increases in the mean levels of TC, LDL-C, non-HDL-C, and TGs were observed after 3-month CBZ monotherapy.

On applying the ANCOVA model for change in lipid levels from Baseline to 3 months a numerical difference was observed between LCM and CBZ for change in TC, LDL-C, non-HDL-C, HDL-C ( $P < .001$  for each) and TGs ( $P = .043$ ) levels.

### FIGURE S3

Least squares mean change in lipids levels from Baseline at 3 months (ANCOVA), lipid levels at Baseline and 3 months (3-month population)

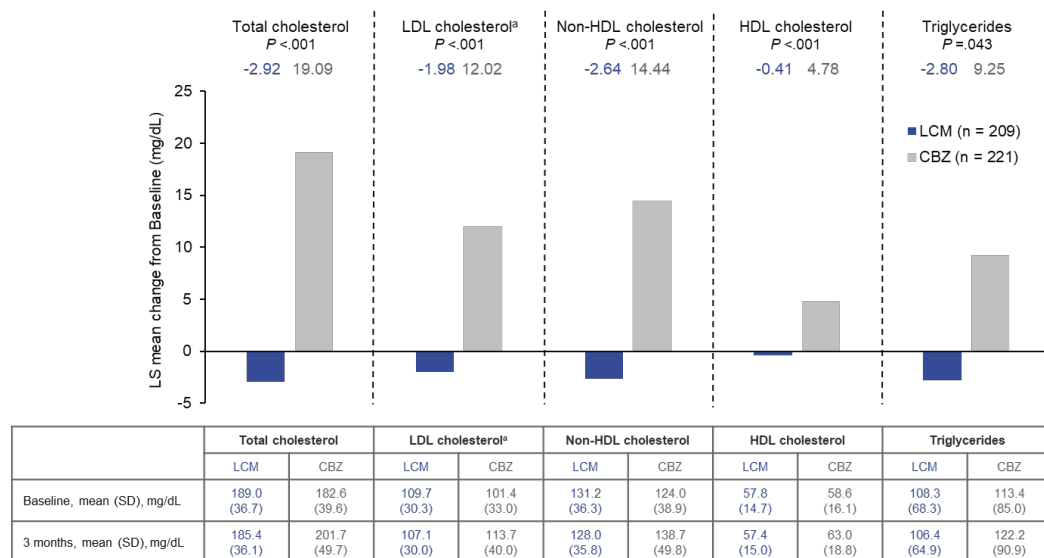

The ANCOVA model included treatment as a main effect and age, sex, body mass index, and Baseline lipid level as covariates. <sup>a</sup>n = 217 for CBZ.

Table includes within treatment group comparison 3-month vs Baseline, paired *t* test; *P* values were based on means of observed values (unadjusted): LCM: Total cholesterol  $P > .05$ ; LDL cholesterol  $P > .05$ ; non-HDL-cholesterol  $P > .05$ ; HDL cholesterol  $P > .05$ ; triglycerides  $P > .05$ .

CBZ: Total cholesterol  $P < .0001$ ; LDL cholesterol  $P < .0001$ ; non-HDL-cholesterol  $P < .0001$ ; HDL cholesterol  $P < .0001$ ; triglycerides  $P > .05$ .

ANCOVA, analysis of covariance; CBZ, carbamazepine; HDL, high-density lipoprotein; LCM, lacosamide; LDL, low-density lipoprotein; LS, least squares; SD, standard deviation



**Supporting information: patients with TC and LDL-C levels above the upper limit of the reference range at Baseline and 3 months**

In patients on LCM monotherapy, the proportion with TC or LDL-C levels above the upper limit of the reference range was similar at Baseline and at 3 months (Figure S4). In patients on CBZ monotherapy, the proportion with TC or LDL-C levels above the upper limit of the reference range was higher at 3 months compared with Baseline.

**FIGURE S4**

Proportion of patients with total cholesterol and/or LDL cholesterol levels above the upper limit of the reference range at Baseline and 3 months (3-month population)

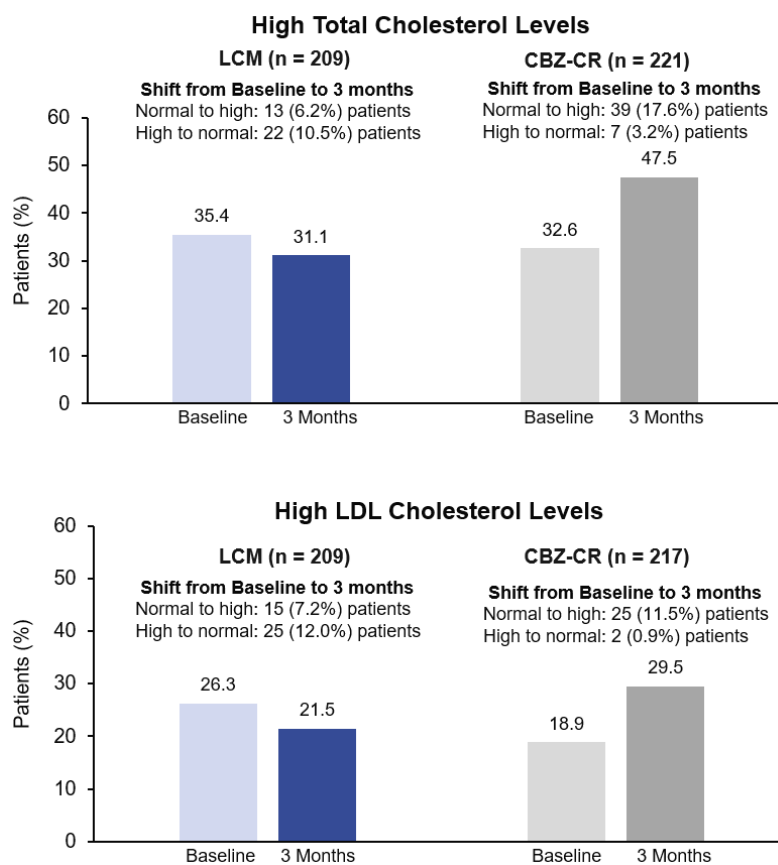

Reference ranges for total cholesterol: normal was 130-200 mg/dL, high was >200 mg/dL; Reference ranges for LDL cholesterol: under 18 years of age, normal was 0-110 mg/dL, high was >110 mg/dL; age 18 years and older, normal was 0-130 mg/dL, high was >130 mg/dL. CBZ, carbamazepine; LCM, lacosamide; LDL, low-density lipoprotein

**Supporting information: proportion of patients with specified increase in lipid level between Baseline and 3 months**

For TC, LDL-C, and non-HDL-C, the proportion of patients with a  $\geq 20$  or  $\geq 40$  mg/dL increase between Baseline and 3 months was higher in patients on CBZ than in those on LCM monotherapy (Figure S5).

**FIGURE S5**

Proportion of patients with a  $\geq 20$  or  $\geq 40$  mg/dL increase in total cholesterol, LDL cholesterol, and non-HDL cholesterol levels from Baseline at 3 months (3-month population)

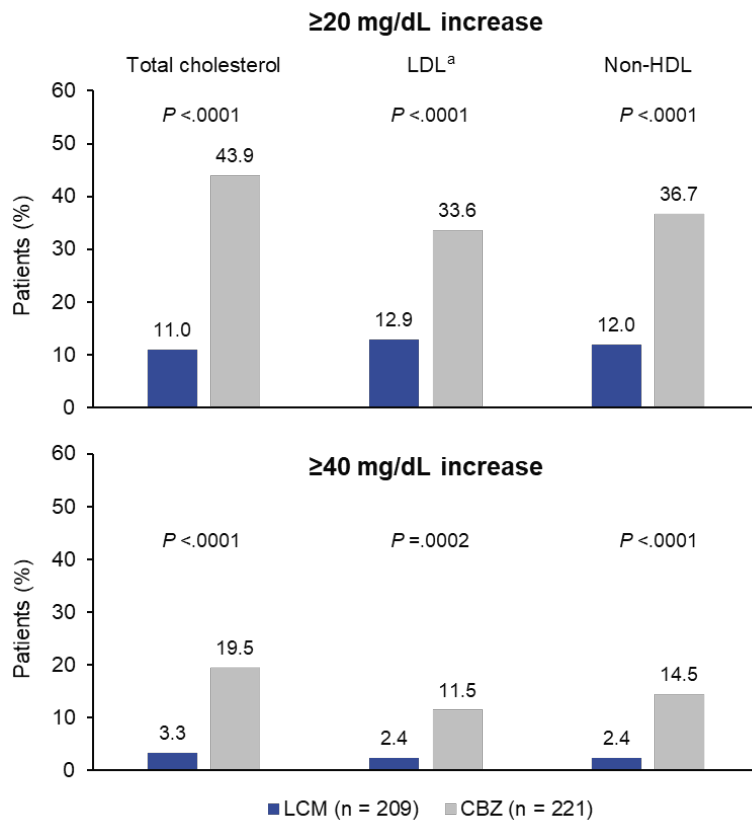

*P*-values are from the Fisher's exact test; <sup>a</sup>n = 217 for CBZ.

CBZ, carbamazepine; HDL, high-density lipoprotein; LCM, lacosamide; LDL, low-density lipoprotein; TC, total cholesterol.
